# Supplementary material
Source: publisher site journal article supplement (https://www.dovepress.com/article/297309)
Supplement: Supplementary file 1 [file get_supplementary_file.php]

Supplementary Material

Supplementary Table 1. Results for exploratory ROI to ROI analysis

| ROI names | Satterthwaite-df | t | model validation |
| --- | --- | --- | --- |
| Insula_L - Cingulum_Ant_L | 46.447 | 7.635*Bonf |  |
| Cingulum_Ant_R - Cingulum_Post_R | 58.000 | -6.973*Bonf |  |
| Temporal_Mid_L - Thalamus_L | 55.880 | -6.841*Bonf |  |
| Cingulum_Ant_R - Cingulum_Post_L | 55.473 | -6.15*Bonf |  |
| Cingulum_Ant_L - Cingulum_Post_L | 49.836 | -6.25*Bonf |  |
| Occipital_Inf_R - Vermis_7 | 58.000 | -5.925*Bonf |  |
| Frontal_Inf_Tri_L - Frontal_Sup_Med_R | 49.248 | 6.013*Bonf |  |
| Fusiform_L - Thalamus_L | 51.634 | -5.968*Bonf |  |
| Insula_L - Cingulum_Ant_R | 49.636 | 5.98*Bonf |  |
| Frontal_Inf_Oper_L - Frontal_Sup_Med_R | 49.085 | 5.893*Bonf |  |
| Fusiform_R - Vermis_7 | 48.671 | -5.772*Bonf |  |
| Cingulum_Ant_L - Cingulum_Post_R | 53.044 | -5.644*Bonf |  |
| Frontal_Inf_Tri_L - Thalamus_L | 53.796 | -5.605*Bonf |  |
| Occipital_Inf_L - Vermis_7 | 52.529 | -5.537*Bonf |  |
| Temporal_Mid_R - Thalamus_L | 55.752 | -5.461*Bonf |  |
| Frontal_Inf_Oper_L - Thalamus_L | 52.722 | -5.489*Bonf |  |
| Cuneus_R - Occipital_Inf_L | 47.663 | -5.462*Bonf |  |
| Fusiform_R - Thalamus_L | 58.000 | -5.263*Bonf |  |
| Lingual_R - Vermis_7 | 52.797 | -5.272*Bonf | failed |
| Temporal_Mid_R - Thalamus_R | 58.000 | -5.183*Bonf |  |
| Cuneus_R - Occipital_Inf_R | 50.466 | -5.22*Bonf |  |
| Cingulum_Post_L - Parietal_Inf_L | 50.961 | 5.153*Bonf |  |
| Frontal_Inf_Tri_L - Frontal_Inf_Orb_R | 48.520 | 5.141*Bonf |  |
| Cerebelum_Crus2_L - Cerebelum_Crus2_R | 55.534 | 5.063*Bonf |  |
| Olfactory_L - Cingulum_Post_L | 58.000 | -5.026*Bonf | failed |
| Temporal_Mid_L - Thalamus_R | 58.000 | -5.017*Bonf |  |
| Frontal_Inf_Tri_L - Frontal_Med_Orb_L | 52.160 | 5.019*Bonf |  |
| Frontal_Mid_Orb_R - Cerebelum_Crus2_L | 53.133 | -4.967*Bonf |  |
| Frontal_Inf_Oper_L - Cingulum_Ant_L | 48.126 | 5.000*FDR |  |
| Frontal_Inf_Tri_L - Frontal_Sup_Med_L | 48.726 | 4.987*FDR |  |
| Insula_R - Cingulum_Ant_R | 50.225 | 4.951*FDR |  |
| Calcarine_L - Vermis_7 | 52.041 | -4.931*FDR |  |
| Fusiform_L - Vermis_7 | 49.958 | -4.942*FDR |  |
| Occipital_Mid_L - Thalamus_L | 55.455 | -4.861*FDR |  |
| Frontal_Inf_Oper_L - Frontal_Med_Orb_L | 49.454 | 4.916*FDR |  |
| Frontal_Inf_Oper_R - Temporal_Mid_L | 51.170 | 4.886*FDR |  |
| Insula_R - Cingulum_Ant_L | 49.349 | 4.901*FDR |  |
| Frontal_Sup_Med_L - Insula_R | 58.000 | 4.797*FDR |  |
| Frontal_Inf_Oper_L - Cingulum_Ant_R | 48.402 | 4.884*FDR |  |
| Lingual_L - Vermis_7 | 50.598 | -4.858*FDR |  |
| Frontal_Mid_Orb_R - Angular_R | 47.947 | -4.862*FDR |  |
| Frontal_Sup_R - Frontal_Inf_Oper_L | 50.708 | 4.825*FDR |  |
| Frontal_Inf_Oper_L - Frontal_Med_Orb_R | 50.094 | 4.808*FDR |  |
| Lingual_L - Precuneus_L | 49.399 | 4.801*FDR |  |
| Frontal_Inf_Oper_R - Temporal_Pole_Sup_L | 49.258 | 4.792*FDR |  |
| Temporal_Inf_R - Thalamus_L | 58.000 | -4.698*FDR |  |
| Cingulum_Ant_L - Temporal_Sup_L | 48.308 | 4.734*FDR |  |
| Parietal_Inf_L - Angular_R | 47.447 | 4.727*FDR |  |
| Frontal_Inf_Oper_L - Frontal_Sup_Med_L | 49.823 | 4.678*FDR |  |
| Frontal_Mid_R - Temporal_Pole_Sup_L | 56.288 | 4.619*FDR |  |
| Rectus_R - Parietal_Sup_L | 50.130 | 4.66*FDR | failed |
| Frontal_Inf_Tri_L - Cingulum_Post_L | 50.178 | 4.637*FDR |  |
| Pallidum_L - Cerebelum_8_R | 54.685 | -4.594*FDR |  |
| Precentral_L - Thalamus_L | 54.381 | -4.595*FDR |  |
| Cuneus_L - Occipital_Inf_L | 50.063 | -4.606*FDR |  |
| Fusiform_L - Thalamus_R | 51.055 | -4.594*FDR | failed |
| Thalamus_L - Thalamus_R | 51.841 | 4.587*FDR |  |
| Cingulum_Ant_L - Temporal_Pole_Sup_R | 49.343 | 4.596*FDR |  |
| Cingulum_Ant_R - Temporal_Pole_Sup_R | 47.958 | 4.607*FDR |  |
| Frontal_Sup_R - Insula_L | 58.000 | 4.508*FDR |  |
| Cerebelum_4_5_R - Thalamus_L | 50.750 | -4.545*FDR |  |
| Frontal_Inf_Tri_R - Temporal_Mid_L | 49.695 | 4.552*FDR |  |
| Cerebelum_4_5_L - Thalamus_L | 55.742 | -4.495*FDR |  |
| Cuneus_L - Occipital_Inf_R | 53.192 | -4.511*FDR |  |
| Frontal_Sup_Med_L - SupraMarginal_L | 50.127 | 4.534*FDR |  |
| Frontal_Inf_Oper_L - Rectus_L | 48.217 | 4.538*FDR |  |
| Precentral_R - Calcarine_R | 55.925 | -4.474*FDR | failed |
| Frontal_Inf_Oper_R - Thalamus_R | 52.595 | -4.475*FDR |  |
| Temporal_Pol_Mid_L - Thalamus_L | 55.214 | -4.454*FDR |  |
| Frontal_Inf_Tri_R - Temporal_Pol_Mid_R | 53.595 | 4.44*FDR |  |
| Insula_R - Postcentral_L | 50.357 | -4.439*FDR |  |
| Supp_Motor_Area_R - Cingulum_Mid_R | 50.510 | 4.413*FDR |  |
| Cuneus_R - Fusiform_R | 49.449 | -4.388*FDR |  |
| Frontal_Med_Orb_R - Insula_L | 55.421 | 4.337*FDR |  |
| Calcarine_R - Vermis_7 | 54.124 | -4.343*FDR |  |
| Olfactory_L - Cingulum_Post_R | 58.000 | -4.318*FDR |  |
| Frontal_Inf_Oper_R - Temporal_Pol_Mid_R | 49.664 | 4.375*FDR |  |
| Occipital_Sup_L - Parietal_Sup_L | 48.645 | 4.381*FDR | failed |
| Cuneus_R - Temporal_Pole_Sup_R | 58.000 | -4.315*FDR |  |
| Occipital_Sup_R - Temporal_Pole_Sup_R | 56.177 | -4.325*FDR |  |
| Olfactory_L - Insula_L | 47.797 | 4.354*FDR | failed |
| Frontal_Inf_Tri_L - Rectus_L | 49.961 | 4.335*FDR |  |
| Frontal_Mid_L - Cingulum_Post_L | 51.419 | 4.317*FDR |  |
| Precentral_L - Cingulum_Post_R | 51.883 | 4.289*FDR |  |
| Calcarine_R - Cerebelum_6_R | 47.165 | -4.325*FDR |  |
| Frontal_Inf_Orb_L - Thalamus_L | 55.951 | -4.256*FDR |  |
| Precentral_R - Calcarine_L | 56.063 | -4.245*FDR |  |
| Cuneus_R - Occipital_Mid_L | 47.477 | -4.288*FDR |  |
| Frontal_Inf_Tri_L - Frontal_Med_Orb_R | 51.067 | 4.26*FDR |  |
| Fusiform_R - Thalamus_R | 54.138 | -4.225*FDR |  |
| SupraMarginal_L - Angular_L | 49.887 | 4.248*FDR |  |
| Parietal_Inf_L - Cerebelum_7b_R | 51.295 | -4.233*FDR |  |
| Temporal_Inf_L - Thalamus_L | 58.000 | -4.192*FDR |  |
| Frontal_Inf_Oper_L - Angular_R | 48.894 | 4.24*FDR |  |
| Angular_R - Cerebelum_Crus2_L | 50.995 | -4.223*FDR |  |
| Precentral_R - Frontal_Sup_R | 50.450 | 4.223*FDR | failed |
| Cuneus_L - Fusiform_R | 52.521 | -4.204*FDR |  |
| Supp_Motor_Area_R - Postcentral_R | 48.371 | -4.228*FDR |  |
| Frontal_Inf_Oper_L - Cingulum_Post_L | 49.242 | 4.208*FDR |  |
| Frontal_Inf_Tri_L - Cingulum_Ant_L | 49.789 | 4.202*FDR |  |
| Frontal_Inf_Tri_R - Temporal_Pole_Sup_L | 48.752 | 4.205*FDR |  |
| Cuneus_L - Occipital_Mid_L | 49.177 | -4.201*FDR |  |
| Insula_L - Cerebelum_8_R | 56.330 | -4.15*FDR |  |
| Frontal_Sup_R - Cerebelum_Crus2_L | 52.565 | -4.166*FDR |  |
| Temporal_Pole_Sup_L - Thalamus_L | 56.435 | -4.134*FDR |  |
| Cingulum_Mid_L - Cerebelum_8_R | 54.633 | -4.144*FDR |  |
| Temporal_Pol_Mid_R - Thalamus_L | 55.518 | -4.135*FDR |  |
| Frontal_Sup_R - Temporal_Pole_Sup_L | 58.000 | 4.113*FDR |  |
| Frontal_Mid_R - Insula_L | 55.217 | 4.104*FDR |  |
| Frontal_Mid_R - Frontal_Mid_Orb_R | 54.442 | -4.1*FDR |  |
| Occipital_Mid_R - Parietal_Sup_L | 52.852 | 4.092*FDR |  |
| Occipital_Inf_R - Vermis_8 | 58.000 | -4.037*FDR |  |
| Cingulum_Ant_R - Temporal_Sup_L | 49.031 | 4.082*FDR |  |
| Amygdala_L - Thalamus_L | 49.374 | -4.077*FDR |  |
| Insula_L - Insula_R | 49.982 | 4.057*FDR |  |
| Precentral_L - Cingulum_Post_L | 49.817 | 4.056*FDR |  |
| Precentral_R - Lingual_L | 55.730 | -4.017*FDR | failed |
| Cerebelum_Crus1_R - Cerebelum_Crus2_L | 50.555 | 4.033*FDR |  |
| Frontal_Sup_Med_R - Insula_R | 58.000 | 3.99*FDR |  |
| Insula_L - Temporal_Pole_Sup_R | 52.499 | 4.018*FDR |  |
| Frontal_Sup_R - Angular_R | 49.142 | -4.023*FDR |  |
| Occipital_Sup_L - Precuneus_L | 48.920 | 4.008*FDR |  |
| Occipital_Mid_R - Thalamus_R | 53.011 | -3.983*FDR |  |
| Olfactory_L - Insula_R | 50.192 | 3.989*FDR |  |
| Temporal_Pol_Mid_R - Thalamus_R | 56.564 | -3.944*FDR |  |
| Fusiform_L - Vermis_3 | 58.000 | -3.929*FDR |  |
| Cingulum_Post_L - Parietal_Sup_L | 58.000 | 3.925*FDR |  |
| Vermis_6 - Vermis_7 | 53.917 | 3.94*FDR |  |
| Cerebelum_10_R - Vermis_7 | 58.000 | 3.92*FDR |  |
| Cuneus_L - Lingual_R | 49.411 | -3.963*FDR | failed |
| Occipital_Inf_L - Putamen_R | 54.594 | -3.932*FDR | failed |
| Cuneus_R - Occipital_Mid_R | 48.103 | -3.964*FDR |  |
| Calcarine_L - Precuneus_L | 52.684 | 3.934*FDR |  |
| Amygdala_R - Occipital_Inf_L | 52.542 | -3.935*FDR |  |
| Frontal_Inf_Tri_L - Temporal_Pol_Mid_R | 51.897 | 3.936*FDR |  |
| Occipital_Sup_R - Precuneus_L | 50.654 | 3.936*FDR |  |
| Occipital_Mid_R - Vermis_7 | 54.497 | -3.908*FDR |  |
| Rectus_L - Parietal_Inf_L | 51.576 | 3.912*FDR |  |
| Frontal_Inf_Tri_L - Cingulum_Ant_R | 51.199 | 3.898*FDR |  |
| Calcarine_R - Precuneus_L | 50.194 | 3.903*FDR |  |
| Postcentral_R - Angular_L | 54.854 | 3.878*FDR |  |
| Frontal_Med_Orb_R - Insula_R | 58.000 | 3.855*FDR |  |
| Frontal_Mid_Orb_R - Parietal_Inf_R | 48.893 | -3.896*FDR |  |
| Frontal_Sup_Med_R - Insula_L | 55.107 | 3.853*FDR |  |
| Rolandic_Oper_R - Postcentral_L | 49.080 | -3.885*FDR |  |
| Calcarine_L - Temporal_Pole_Sup_R | 58.000 | -3.833*FDR |  |
| Frontal_Med_Orb_L - Cingulum_Ant_R | 50.636 | -3.868*FDR |  |
| Frontal_Inf_Tri_L - Rectus_R | 53.542 | 3.841*FDR |  |
| Occipital_Mid_R - Thalamus_L | 56.913 | -3.824*FDR | failed |
| Frontal_Inf_Oper_L - Frontal_Inf_Orb_R | 48.384 | 3.86*FDR |  |
| Cerebelum_4_5_L - Thalamus_R | 54.147 | -3.822*FDR |  |
| Frontal_Inf_Tri_R - Temporal_Mid_R | 52.547 | 3.82*FDR |  |
| Frontal_Med_Orb_L - Parietal_Inf_L | 55.410 | 3.8*FDR |  |
| Frontal_Med_Orb_R - SupraMarginal_L | 52.544 | 3.813*FDR |  |
| Frontal_Sup_Med_R - SupraMarginal_L | 49.968 | 3.82*FDR |  |
| Olfactory_R - Cingulum_Post_L | 58.000 | -3.78*FDR |  |
| Lingual_R - Precuneus_L | 50.363 | 3.806*FDR |  |
| Precentral_L - Frontal_Sup_Med_R | 48.074 | 3.817*FDR |  |
| Cingulum_Post_R - Parietal_Sup_L | 58.000 | 3.766*FDR |  |
| Frontal_Inf_Oper_R - Frontal_Sup_Med_L | 52.350 | 3.787*FDR |  |
| Cingulum_Post_R - Parietal_Inf_L | 58.000 | 3.758*FDR |  |
| Occipital_Inf_R - Putamen_L | 58.000 | -3.757*FDR |  |
| Temporal_Pol_Mid_L - Vermis_3 | 56.281 | -3.759*FDR |  |
| Rectus_R - Cingulum_Ant_R | 47.927 | -3.79*FDR |  |
| Postcentral_L - Temporal_Sup_L | 54.087 | -3.757*FDR |  |
| Frontal_Inf_Tri_L - Temporal_Inf_R | 52.158 | 3.764*FDR |  |
| Postcentral_L - Heschl_R | 48.881 | -3.775*FDR |  |
| Occipital_Inf_L - Thalamus_L | 55.655 | -3.738*FDR |  |
| Frontal_Inf_Oper_R - Thalamus_L | 52.677 | -3.748*FDR |  |
| Supp_Motor_Area_L - Occipital_Mid_R | 51.977 | -3.746*FDR |  |
| Frontal_Inf_Oper_R - Temporal_Mid_R | 51.051 | 3.75*FDR |  |
| Rectus_R - Cingulum_Ant_L | 48.954 | -3.757*FDR |  |
| Frontal_Inf_Oper_L - Temporal_Pol_Mid_R | 51.264 | 3.743*FDR |  |
| Frontal_Sup_L - Temporal_Pole_Sup_R | 54.756 | 3.722*FDR |  |
| Supp_Motor_Area_L - Occipital_Sup_L | 51.461 | -3.733*FDR |  |
| Frontal_Inf_Oper_L - Cerebelum_8_R | 55.982 | -3.705*FDR |  |
| Amygdala_L - Postcentral_L | 55.948 | -3.692*FDR |  |
| Occipital_Inf_L - Vermis_3 | 58.000 | -3.679*FDR |  |
| Hippocampus_L - Caudate_R | 52.633 | 3.693*FDR |  |
| Insula_L - Postcentral_L | 52.780 | -3.69*FDR |  |
| Supp_Motor_Area_L - Cerebelum_8_R | 52.626 | -3.686*FDR |  |
| Putamen_L - Temporal_Pole_Sup_L | 56.460 | -3.67*FDR |  |
| Frontal_Inf_Oper_L - Temporal_Mid_R | 51.217 | 3.689*FDR |  |
| Parietal_Inf_L - Angular_L | 52.798 | 3.669*FDR |  |
| Parietal_Sup_L - Parietal_Sup_R | 49.724 | 3.684*FDR |  |
| Frontal_Sup_Med_L - Temporal_Pole_Sup_R | 56.572 | 3.65*FDR |  |
| Frontal_Inf_Tri_L - Putamen_L | 53.390 | -3.66*FDR |  |
| Frontal_Inf_Tri_L - Cerebelum_3_L | 53.542 | 3.659*FDR |  |
| Frontal_Inf_Tri_L - Angular_R | 50.708 | 3.667*FDR |  |
| Cuneus_L - Temporal_Pole_Sup_R | 58.000 | -3.633*FDR |  |
| Amygdala_R - Occipital_Inf_R | 50.383 | -3.66*FDR |  |
| Cingulum_Post_L - Thalamus_R | 50.308 | -3.658*FDR |  |
| Calcarine_R - Temporal_Pole_Sup_R | 56.419 | -3.629*FDR |  |
| Olfactory_L - Paracentral_Lob_R | 52.012 | -3.646*FDR |  |
| Frontal_Inf_Oper_L - Precuneus_R | 53.590 | 3.634*FDR |  |
| Frontal_Sup_Orb_R - Parietal_Inf_R | 48.692 | -3.654*FDR |  |
| Frontal_Sup_L - Cerebelum_6_L | 53.396 | 3.629*FDR |  |
| Frontal_Inf_Tri_R - Thalamus_R | 51.891 | -3.634*FDR |  |
| Frontal_Sup_L - Insula_R | 58.000 | 3.597*FDR |  |
| Cerebelum_4_5_R - Thalamus_R | 50.197 | -3.629*FDR |  |
| Parietal_Sup_L - Angular_R | 46.980 | 3.642*FDR |  |
| Postcentral_L - Angular_L | 52.952 | 3.608*FDR |  |
| Frontal_Inf_Tri_R - Cingulum_Ant_L | 51.745 | 3.612*FDR |  |
| Amygdala_L - Caudate_R | 51.941 | 3.61*FDR |  |
| Olfactory_R - Frontal_Med_Orb_L | 54.691 | -3.593*FDR |  |
| Supp_Motor_Area_L - Parietal_Sup_L | 55.482 | -3.589*FDR |  |
| Cerebelum_Crus2_L - Cerebelum_6_R | 50.385 | 3.607*FDR |  |
| Frontal_Inf_Tri_R - Thalamus_L | 50.633 | -3.605*FDR |  |
| Frontal_Mid_R - Temporal_Pol_Mid_L | 54.063 | 3.589*FDR |  |
| Frontal_Sup_Med_L - Temporal_Sup_L | 51.594 | 3.595*FDR | failed |
| Olfactory_L - Frontal_Med_Orb_L | 48.821 | -3.606*FDR |  |
| Cingulum_Ant_R - Angular_L | 47.624 | -3.61*FDR |  |
| Insula_L - Postcentral_R | 51.254 | -3.583*FDR |  |
| Frontal_Inf_Oper_R - Cingulum_Ant_L | 50.416 | 3.586*FDR |  |
| Fusiform_R - Vermis_3 | 54.310 | -3.566*FDR |  |
| Lingual_R - Cerebelum_6_R | 46.984 | -3.594*FDR |  |
| Putamen_L - Temporal_Mid_L | 58.000 | -3.545*FDR |  |
| Rectus_R - Occipital_Inf_L | 52.803 | 3.56*FDR | failed |
| Occipital_Inf_L - Vermis_8 | 55.270 | -3.546*FDR |  |
| SupraMarginal_L - Angular_R | 53.562 | 3.552*FDR |  |
| Rectus_L - Parietal_Sup_L | 51.183 | 3.561*FDR |  |
| Frontal_Inf_Oper_R - Rectus_L | 50.630 | 3.56*FDR |  |
| Frontal_Mid_L - Cingulum_Post_R | 52.303 | 3.55*FDR |  |
| Insula_R - Temporal_Pole_Sup_R | 56.438 | 3.531*FDR |  |
| Temporal_Inf_R - Thalamus_R | 54.068 | -3.536*FDR |  |
| Frontal_Mid_R - Cerebelum_7b_L | 51.137 | -3.545*FDR |  |
| Occipital_Inf_L - Cerebelum_4_5_L | 54.387 | -3.528*FDR |  |
| Occipital_Inf_R - Putamen_R | 56.865 | -3.517*FDR |  |
| Amygdala_R - Postcentral_L | 58.000 | -3.508*FDR |  |
| Frontal_Sup_Med_L - Insula_L | 55.333 | 3.513*FDR |  |
| Frontal_Inf_Orb_L - Putamen_L | 53.407 | -3.515*FDR |  |
| Frontal_Med_Orb_R - Cingulum_Post_R | 53.274 | -3.515*FDR |  |
| Fusiform_L - Temporal_Mid_L | 50.533 | 3.526*FDR |  |
| Occipital_Mid_L - Vermis_7 | 55.933 | -3.504*FDR |  |
| Cingulum_Post_R - Thalamus_R | 49.599 | -3.529*FDR |  |
| Cerebelum_8_L - Cerebelum_10_L | 51.012 | 3.519*FDR |  |
| Frontal_Inf_Oper_R - Frontal_Inf_Orb_R | 48.116 | 3.53*FDR |  |
| Occipital_Sup_L - Temporal_Pole_Sup_R | 56.816 | -3.492*FDR |  |
| Postcentral_L - Temporal_Pole_Sup_R | 49.855 | -3.516*FDR | failed |
| Frontal_Mid_Orb_L - Cerebelum_Crus2_R | 54.304 | -3.494*FDR |  |
| Frontal_Inf_Oper_L - Cingulum_Post_R | 55.213 | 3.49*FDR |  |
| Postcentral_R - Thalamus_R | 56.343 | -3.485*FDR |  |
| Cingulum_Ant_R - Temporal_Pole_Sup_L | 48.481 | 3.514*FDR |  |
| Occipital_Inf_L - Occipital_Inf_R | 51.579 | 3.498*FDR |  |
| Calcarine_L - Cerebelum_6_R | 47.354 | -3.516*FDR |  |
| Cuneus_R - Lingual_R | 46.443 | -3.521*FDR |  |
| Frontal_Inf_Tri_L - Temporal_Mid_R | 54.518 | 3.483*FDR |  |
| Precentral_R - Vermis_6 | 55.330 | -3.473*FDR |  |
| Frontal_Sup_Orb_R - Cerebelum_Crus2_L | 52.595 | -3.482*FDR |  |
| Frontal_Inf_Oper_R - Cingulum_Ant_R | 50.172 | 3.487*FDR |  |
| Insula_L - Cerebelum_9_L | 54.632 | 3.468*FDR |  |
| Insula_L - Angular_R | 55.015 | 3.464*FDR |  |
| Amygdala_L - SupraMarginal_L | 53.199 | -3.469*FDR |  |
| Lingual_L - Parietal_Sup_L | 49.419 | 3.481*FDR |  |
| Rectus_R - Occipital_Mid_L | 52.636 | 3.46*FDR |  |
| Frontal_Sup_R - Insula_R | 56.527 | 3.443*FDR |  |
| Cerebelum_Crus2_L - Cerebelum_8_R | 53.409 | 3.452*FDR |  |
| Cuneus_L - Occipital_Mid_R | 50.948 | -3.459*FDR |  |
| Frontal_Inf_Tri_L - Amygdala_L | 54.955 | -3.442*FDR |  |
| Precuneus_L - Cerebelum_8_L | 54.997 | -3.433*FDR | failed |
| Calcarine_R - Occipital_Inf_R | 54.132 | -3.436*FDR |  |
| Frontal_Mid_R - Cerebelum_Crus2_L | 52.542 | -3.438*FDR |  |
| Frontal_Sup_R - Frontal_Inf_Tri_L | 50.454 | 3.443*FDR |  |
| Frontal_Med_Orb_L - Cingulum_Ant_L | 48.282 | -3.45*FDR |  |
| Insula_R - Postcentral_R | 54.395 | -3.421*FDR |  |
| Frontal_Med_Orb_R - Cingulum_Post_L | 50.834 | -3.432*FDR |  |
| Postcentral_R - Thalamus_L | 55.504 | -3.399*FDR |  |
| Temporal_Pol_Mid_R - Vermis_3 | 52.540 | -3.406*FDR |  |
| Occipital_Sup_R - Precuneus_R | 49.349 | 3.412*FDR |  |
| Lingual_R - Vermis_6 | 53.497 | -3.384*FDR |  |
| Occipital_Inf_R - Precuneus_L | 56.984 | 3.366*FDR |  |
| Occipital_Mid_L - Vermis_3 | 56.779 | -3.365*FDR |  |
| Cingulum_Post_L - Thalamus_L | 50.479 | -3.384*FDR | failed |
| Rectus_L - Cingulum_Ant_R | 48.110 | -3.393*FDR |  |
| Frontal_Sup_R - Cerebelum_6_R | 53.201 | 3.372*FDR |  |
| Frontal_Inf_Tri_R - Frontal_Sup_Med_L | 52.408 | 3.372*FDR |  |
| Cerebelum_8_R - Thalamus_L | 55.275 | -3.361*FDR | failed |
| Cerebelum_Crus2_L - Cerebelum_7b_R | 52.520 | 3.369*FDR |  |
| Occipital_Sup_R - Parietal_Sup_L | 51.349 | 3.37*FDR |  |
| Insula_R - Temporal_Pole_Sup_L | 58.000 | 3.338*FDR |  |
| Frontal_Inf_Oper_L - Rectus_R | 52.306 | 3.355*FDR |  |
| Cerebelum_6_R - Thalamus_L | 55.459 | -3.333*FDR |  |
| Precentral_L - Angular_R | 53.699 | 3.337*FDR |  |
| Frontal_Inf_Tri_R - Olfactory_L | 54.067 | 3.328*FDR | failed |
| Occipital_Inf_R - Temporal_Mid_R | 58.000 | 3.315*FDR |  |
| Occipital_Sup_R - Occipital_Inf_R | 52.322 | -3.318*FDR |  |
| Frontal_Sup_R - Frontal_Inf_Oper_R | 47.714 | 3.333*FDR |  |
| Frontal_Inf_Tri_L - Thalamus_R | 54.470 | -3.299*FDR |  |
| Putamen_L - Temporal_Inf_R | 51.696 | -3.305*FDR |  |
| Cuneus_L - Cerebelum_6_R | 50.352 | -3.31*FDR |  |
| Insula_R - Cuneus_R | 54.205 | -3.295*FDR |  |
| Precentral_R - Cerebelum_6_R | 58.000 | -3.28*FDR |  |
| Frontal_Inf_Tri_L - Precuneus_R | 52.934 | 3.295*FDR |  |
| Frontal_Inf_Oper_R - Olfactory_L | 52.287 | 3.295*FDR |  |
| Rectus_L - SupraMarginal_L | 48.295 | 3.31*FDR |  |
| Fusiform_L - Temporal_Inf_R | 50.158 | 3.302*FDR |  |
| Lingual_R - Parietal_Sup_L | 50.130 | 3.301*FDR |  |
| Temporal_Mid_L - Temporal_Inf_R | 51.221 | 3.296*FDR | failed |
| Supp_Motor_Area_R - Postcentral_L | 49.648 | -3.302*FDR |  |
| Lingual_L - Temporal_Pole_Sup_R | 58.000 | -3.274*FDR |  |
| Cingulum_Post_R - Hippocampus_R | 54.039 | -3.284*FDR | failed |
| Frontal_Inf_Orb_R - Insula_L | 51.151 | 3.294*FDR |  |
| Olfactory_L - Temporal_Sup_L | 50.846 | 3.292*FDR |  |
| Temporal_Pole_Sup_L - Thalamus_R | 52.113 | -3.287*FDR |  |
| Occipital_Mid_L - Thalamus_R | 53.668 | -3.279*FDR |  |
| Frontal_Inf_Tri_R - Rectus_L | 55.382 | 3.272*FDR |  |
| Frontal_Inf_Oper_L - Vermis_10 | 58.000 | 3.264*FDR |  |
| Supp_Motor_Area_L - Cingulum_Mid_R | 52.867 | 3.278*FDR |  |
| Putamen_L - Cerebelum_8_R | 53.252 | -3.276*FDR |  |
| Precentral_L - Frontal_Sup_R | 51.572 | 3.282*FDR |  |
| Cerebelum_Crus2_R - Vermis_7 | 50.644 | 3.278*FDR |  |
| Insula_L - Cerebelum_Crus2_L | 52.402 | 3.259*FDR |  |
| Lingual_L - Vermis_6 | 50.942 | -3.257*FDR |  |
| Calcarine_R - Occipital_Inf_L | 49.381 | -3.258*FDR |  |
| Frontal_Inf_Oper_L - Temporal_Mid_L | 48.932 | 3.256*FDR |  |
| Frontal_Mid_L - Frontal_Sup_Med_L | 48.703 | 3.254*FDR |  |
| Occipital_Sup_L - Vermis_7 | 52.983 | -3.228*FDR |  |
| Insula_R - Angular_L | 51.551 | 3.228*FDR |  |
| Precuneus_L - Cerebelum_9_L | 52.753 | -3.222*FDR |  |
| Supp_Motor_Area_L - Occipital_Inf_L | 54.810 | -3.211*FDR |  |
| Temporal_Pole_Sup_R - Temporal_Pol_Mid_R | 48.744 | 3.231*FDR |  |
| Insula_R - Occipital_Sup_R | 58.000 | -3.198*FDR | failed |
| Cerebelum_Crus2_L - Cerebelum_10_L | 54.717 | 3.205*FDR |  |
| Lingual_R - Temporal_Pole_Sup_R | 53.143 | -3.21*FDR | failed |
| Occipital_Inf_R - Parietal_Inf_L | 54.790 | 3.205*FDR |  |
| Insula_R - Cerebelum_9_L | 58.000 | 3.193*FDR |  |
| Frontal_Med_Orb_L - Parietal_Sup_L | 54.291 | 3.202*FDR |  |
| Frontal_Inf_Tri_R - Frontal_Inf_Orb_R | 49.724 | 3.212*FDR |  |
| Frontal_Inf_Oper_R - Olfactory_R | 55.169 | 3.194*FDR |  |
| Calcarine_L - Vermis_6 | 52.565 | -3.201*FDR |  |
| Precentral_L - Rectus_R | 48.677 | 3.214*FDR |  |
| Olfactory_L - Temporal_Pole_Sup_R | 50.426 | 3.207*FDR |  |
| Frontal_Sup_Orb_R - Angular_R | 52.194 | -3.201*FDR |  |
| Frontal_Sup_Orb_L - Heschl_R | 58.000 | -3.177*FDR |  |
| Frontal_Inf_Oper_R - Frontal_Sup_Med_R | 48.747 | 3.202*FDR |  |
| Precuneus_R - Thalamus_R | 54.972 | -3.18*FDR |  |
| Supp_Motor_Area_R - Cingulum_Ant_R | 47.096 | 3.204*FDR |  |
| Occipital_Inf_L - Parietal_Inf_L | 49.840 | 3.194*FDR |  |
| Cingulum_Ant_R - Precuneus_R | 52.927 | -3.184*FDR |  |
| Temporal_Inf_L - Thalamus_R | 58.000 | -3.163*FDR |  |
| Putamen_L - Cerebelum_3_R | 53.255 | 3.176*FDR |  |
| Temporal_Mid_L - Vermis_3 | 56.258 | -3.167*FDR |  |
| Temporal_Mid_R - Temporal_Inf_R | 51.924 | 3.179*FDR |  |
| Frontal_Inf_Orb_R - Paracentral_Lob_R | 58.000 | -3.162*FDR |  |
| Cingulum_Post_L - Caudate_R | 58.000 | -3.16*FDR |  |
| Occipital_Inf_R - Vermis_6 | 58.000 | -3.16*FDR |  |
| Frontal_Inf_Tri_L - Temporal_Mid_L | 48.324 | 3.185*FDR |  |
| Frontal_Sup_Orb_L - Rectus_R | 53.816 | 3.161*FDR |  |
| Angular_R - Thalamus_R | 58.000 | -3.149*FDR |  |
| Frontal_Inf_Tri_L - Cingulum_Post_R | 56.514 | 3.149*FDR |  |

Notes:

*** p<0.001, **p<0.01, *p<0.05, FDR correction

Model validation failed = p>0.05 for Shapiro-Wilk test for residual from linear mixed model.

ROI names from AAL (https://www.gin.cnrs.fr/en/tools/aal/)

Supplementary Table 2. aal ROI names of figure 6

| number in Fig. 6 | aal names |
| --- | --- |
| 1 | Frontal Sup L |
| 2 | Frontal Sup R |
| 3 | Frontal Sup Orb L |
| 4 | Frontal Sup Orb R |
| 5 | Frontal Mid L |
| 6 | Frontal Mid R |
| 7 | Frontal Mid Orb L |
| 8 | Frontal Mid Orb R |
| 9 | Frontal Inf Oper L |
| 10 | Frontal Inf Oper R |
| 11 | Frontal Inf Tri L |
| 12 | Frontal Inf Tri R |
| 13 | Frontal Inf Orb L |
| 14 | Frontal Inf Orb R |
| 15 | Olfactory L |
| 16 | Olfactory R |
| 17 | Frontal Sup Med L |
| 18 | Frontal Sup Med R |
| 19 | Frontal Med Orb L |
| 20 | Frontal Med Orb R |
| 21 | Rectus L |
| 22 | Rectus R |
| 23 | Rolandic Oper L |
| 24 | Rolandic Oper R |
| 25 | Precentral L |
| 26 | Precentral R |
| 27 | Supp Motor Area L |
| 28 | Supp Motor Area R |
| 29 | Postcentral L |
| 30 | Postcentral R |
| 31 | Paracentral Lob L |
| 32 | Paracentral Lob R |
| 33 | Heschl L |
| 34 | Heschl R |
| 35 | Temporal Sup L |
| 36 | Temporal Sup R |
| 37 | Temporal Pole Sup L |
| 38 | Temporal Pole Sup R |
| 39 | Temporal Mid L |
| 40 | Temporal Mid R |
| 41 | Temporal Pol Mid L |
| 42 | Temporal Pol Mid R |
| 43 | Temporal Inf L |
| 44 | Temporal Inf R |
| 45 | Parietal Sup L |
| 46 | Parietal Sup R |
| 47 | Parietal Inf L |
| 48 | Parietal Inf R |
| 49 | SupraMarginal L |
| 50 | SupraMarginal R |
| 51 | Angular L |
| 52 | Angular R |
| 53 | Precuneus L |
| 54 | Precuneus R |
| 55 | Calcarine L |
| 56 | Calcarine R |
| 57 | Cuneus L |
| 58 | Cuneus R |
| 59 | Lingual L |
| 60 | Lingual R |
| 61 | Occipital Sup L |
| 62 | Occipital Sup R |
| 63 | Occipital Mid L |
| 64 | Occipital Mid R |
| 65 | Occipital Inf L |
| 66 | Occipital Inf R |
| 67 | Fusiform L |
| 68 | Fusiform R |
| 69 | Insula L |
| 70 | Insula R |
| 71 | Cingulum Ant L |
| 72 | Cingulum Ant R |
| 73 | Cingulum Mid L |
| 74 | Cingulum Mid R |
| 75 | Cingulum Post L |
| 76 | Cingulum Post R |
| 77 | Caudate L |
| 78 | Caudate R |
| 79 | Hippocampus L |
| 80 | Hippocampus R |
| 81 | ParaHippocampal L |
| 82 | ParaHippocampal R |
| 83 | Amygdala L |
| 84 | Amygdala R |
| 85 | Putamen L |
| 86 | Putamen R |
| 87 | Pallidum L |
| 88 | Pallidum R |
| 89 | Cerebelum Crus1 L |
| 90 | Cerebelum Crus1 R |
| 91 | Cerebelum Crus2 L |
| 92 | Cerebelum Crus2 R |
| 93 | Cerebelum 3 L |
| 94 | Cerebelum 3 R |
| 95 | Cerebelum 4 5 L |
| 96 | Cerebelum 4 5 R |
| 97 | Cerebelum 6 L |
| 98 | Cerebelum 6 R |
| 99 | Cerebelum 7b L |
| 100 | Cerebelum 7b R |
| 101 | Cerebelum 8 L |
| 102 | Cerebelum 8 R |
| 103 | Cerebelum 9 L |
| 104 | Cerebelum 9 R |
| 105 | Cerebelum 10 L |
| 106 | Cerebelum 10 R |
| 107 | Vermis 1 2 |
| 108 | Vermis 3 |
| 109 | Vermis 4 5 |
| 110 | Vermis 6 |
| 111 | Vermis 7 |
| 112 | Vermis 8 |
| 113 | Vermis 9 |
| 114 | Vermis 10 |
| 115 | Thalamus L |
| 116 | Thalamus R |
